# Supplementary material
Source: publisher figshare collection journal article supplement (https://gsajournals.figshare.com/ndownloader/files/13430777)
Supplement: Supplementary file 1 [file 13430777]

The yellow (5’ end) and red (3’ end) segments are binding sequence of the L6-F primer and the R12-R primer, respectively. The “NNNNNNNNNN” segment reprsents the deleted 5.16-Mb sequence in *muw*. Blood-red letters and short dashed lines reprsent SNPs and InDels between *muw* and B73, respectively.

CCCACCATCAAAATCACCTTCGTTATCTCTTATCCTTCATTCCCCACGTTTCCACCGTCCCCTATATATTACTCGCACACCGTCGCTACTGCCGTCAATCTATCCTCTTACGTTGTCCTGACCCCTCTCTAAGATCGTAACGATAGGCTATAGGCTAATAAAGAGTATATGCAATATAATGTTAGCTCGAACTATATGATAGTAAAGAGTATGATATCAATATTAACATGTGCTATATGCTAATAAAGAGTAAAGTCACATGATGTCAATATAATGCTAGGATGATTTCATTAATGAGAACATATCTGTCGAGGACCATAATTAGGGATACCCCCAACACTCCTAATCTC**T**GCTGGTAACCCCCATCAGCACAAAGCTGCAAAGGCCTGATGGGCGTGATTCCGGTCA**C**GGCTCCGTCCACACGAGGGACACGATCTCGTCTCGCCCGAGCCCAGCCTCGGGCAGGAACAGTAGACCAAGGCAGATTCACGCCTCGCCCGAGGGTCTCCTCAAGCAACGGACGCACCTTCGACTCGCCCGAAGCCTAGCTCGGGCAGGCTTCGCGGAGAAG**---**CAACCTTGGCCGGATCGCTACGCCAACCGACCGTATCGCAGGAGCATTCAATGCAAGGATCGTCTGACACCTTATCCTGACGCACGCTCTTC**T**GTCGACAGAGCCGAAGTGACCGCAGTCACTTCGCCGCTCCACTGGCCGACCTGACAGGAAAACA**T**CGCCGCCTGCGCTGCTCCGACTGCTGTGCCACCCGTCAGGGTGAGGCTGACGGCCGC**G**AAGATCGGCCTCAGGTGCCATAGGAAGCTCCGCCTCGCCTGACCCCTAAGCTCGGACTCAGCCTCGACCTCGGACGACGGTCTCCGCCTCGCCCGACCCCTGAGCTCGGACTCAGACTCGACCTCAGACGACGGTCTCCGCCTCGCCCGACCCCAGGGCTCGGACTCAGCCTCGACCTCGGACGACGGTCTCCGCCTCGCCCGACCCCTGAGCTCGGACTCAGCCTCGACCTCGGACGACGGTCTCCGCCTCGCCCGACCCCTGAGCTCGGACTCAGCCTCGACCTCGGAAGATGGACTCCGCCTCGCCCGACCCCCGGGGCTCGGACTCTACCTCGACCTCGGACGACGGTCTCCGCCTCGCCCGACCCCCGGGGCTCGGACTCAACCTCG**G**CCTCGGAC**A**ACGGTCTCCGCCTCGCCCG**T**CCCCTGGGGCTCAGACTCAACCTCGACCTCGGAGGAGCCTCCGCCTCGCCCGACCTCAGACGACGGTCTCCGCCTCGCCCGACCCCAGG**T**CTCGGACTCAGCCTCGACCTCGAACAACGGTCTCCGCCTCGCCCGACCCCAGGGCTCGGACTCAGCCTCGACCTCGGACGACGGTCTCCGCCTCGCCCGACCCCTGAGCTCG**A**ACTCAGCCTCGACCTCGGAAGATGGACTCCGCCTCGCCCGACCCCCGGGGCTCGGACTCTACCTCGACCTCGGACGACGGTCTCCGCCTCGCCCGACCCCCGGGGCTCGGACT**G**AACCTCGACCTCGGACGACAATCTCCGCCTCGCCCGACCCCTGGGGCTCGGACTCAACCTCGACCTCGGAGGAGCCTCCGCCTCGCCCGACCTCGGACTCGGACCGACCATGTCACAAGGGCGCCATCATTACCCTACCCCTAGCTAGCTCAGGCTACGGGGAACAAGACCGGCGTCCCA**G**CTGGCTCGCCCCGGTAAACAAGTGATGATGGCACCCCGCGTGCTCCATGACGACGGCGGCTCTCAGCCCCTTACGGAAGCAAGGAGACGTCAGCAAGGATCCGACAACCCCGACAGCTGTACTTCCACGGGGCTCAAGCGCTTCTTCGACGGCCACAACACCACATGAATAGGGCGCCAAAACCTCTCCGACAGCCACGGCGGCATGTACACAGGGATCTGGCTTCCCTCTGCTAGACACGTTAGCACATTGCTACACCCCCCGTTGTACACTTGGGCCCTCTCCTTACATCTATAAAAGGAAGGTCCAGGGCTCTCGTACGAGAAGGTGGCCGCGCGGGAGGACAGGCTGACACACGAGGCTCACGCTCTCTCTCTCTCCCA**G**GTGAACGCTTGTAACCCCCTACTGCAAGCGCATCCGCCCTGGGCGCAGGACAACACGAGGCCGCAGTTTCCCCTTACTGTTTTCCCCCCTTGTGTTCCGTCTCGCGCCGACCCATCTGGGCTGGGACACGCAGCGACAATTTACTCGTCGGTCTAGGGACCCCCCGGGGTCGAAACGCCGACAGTTGGCGCGCCAGGTAGGGGCCTGCTGCGTGTTGACG**T**ACAGCTTCCCGTCAAGCTCCAGATGGGAGTCTCCAACAACCTCTCCAACCCGGGACGGTGCTCCGTTTCGGGTGTCTTGAGTTCATGTCCCTCGACGGCAGCTACGACATGATACTCTTTCCTCTGTCGCGCGACAACGACAATGGCGGCCGTCAGCCCGCCCGCCGGCGGCGGAATCGACGACGTCTTCCCCGCGTGATGGAAGAGCAACATCCGGGTCTGTCCCGTCACCTTCCCCGCCGACGGAGGAGGAGGCGGGGCAGGCATGGCCAGGCAGGAGGCGGCACCTCGTCGGCTGTCGAGCGAGTCGACGGCGCCGGTGCCCCAACGGGGGACACGTCGGGCGTTGACCTTGCGTATAAGACGAAGACGAGCGTCGTTGAAAGGGAATTAGGCTTACACCTAGTTCCTAAATAATTTTGGTGGTTGAATTGCCCAACACAAATATTGGACTGACTAGTTTGCTCTAGTGTATAAGATGTACAGGTGCAAAAGGTTCACATCTAGCCAATAAAAAGATCAAGTATTGGATTCAATAAAGGAGCAAAGGGGCAACCGAGGGCACCCCTGGTCTGGCGCACCGGACTGTCCGGTGTGCCACCGGACAGTGAACAGTACCTGTCCGGTGCACCAGGGAACTCAGACTCAAACTCTTCACCCTCGGGATTTCTCGGAAGGCGGCGCGCTATAATTCACCGGACTGTCCGGTGTGCACCGGACATGTCCGGTGCTCCAAGGAAGCTCGGCCTCCTGAACTCGCCAGCCTCGGGTTTGCGCGGCAGCCGCTCCGCTATAATTCACCGGACTGTCCGGTGTGCACCGGACTGTCCGGTGTGCCAGCGGAGCAACGGCTCCCTGCGGCGCCAACGGCTCCCTGCGCTGCATTTAATGCGCGCGCAGCGCGCGCAGAAGGCAGAATCGCCCATACCGGTGCACCGGACATCAAACAGTGCATGTCCGGTGTACACCGGACATCCAGGCGGGGCCACATGTCAGAGCTCCAACGGTCAGAATCCAACGGCAACGATGACGTGGCAGGGGGCACCGGACTGTCCGGTGTGCACCGGACTGTCCGGTGCGCCATCGAACAGAGAGCTCCCAGCAACGGCCACATTTGGTGGTTGGGGCTATAAATACCCCAACCACCCCACATTCATAGCCATCCAAGTTTTCCAACTTCTAACCACTTACAAGAGC-TAGGCATTCAATTCTAGACACATACAAAGAGATCAAATCCTCTCCAATTCCACTCAAGCCTTTAGTGACTAGCGAGAGAGATTTGCCGTGTTCTTTTGAGCTCTTGCGCTTGGATCGCATTCTTTCTTTCTCTTTTGCTCTTGTGATCAACACTCAATTGTAACCGAGGCAAGAGGCACCGATTGTGTGGTGGCCCTTGTGGGGAAGTTTTGTTCCCGGTTGATTGAGAAGAAGGAAAGCTCGCTCGGTCCGAGGGACCGTTTGAGAGAGGGAAGGGTTGAAAGAGACCCGGCCTTTGTGGCCTCCTCAACGGGGAGT**T**GGTTTGCAAGAACCGAACCTCGGTAAAACAAATCCACGTGTCACTCTCCTTATTTGCTTGCGATTTGTTTTGCGCCCTCTCTTGCGGACTCATTTATTATTACTAACGCTAACCCCGGCTTGTAGTTGTGATTATTTTTGTAAATTTCAGTTTCGCCCTATTCACCCCCCTCTAGGCGACTATCAATTGGTATCAGAGCCCGGTGCTTCATTAGAGCCTAACCGCTCGAAGTGATGTCGGGAGATCACGCCAAGAAGGAGATGGAGACCGGCGACAAGCCCACTAC**G**AGCCAAGGGA**T**CACCTCATCGG**C**AGAGTCCCGCACCAAGAAAAGGGAGAAGAAGAAGAACTCCTCCAAACGGAAGGAGAAAAGATCGCCCTCTTCTCACCACAAGGAGAAGAAGGAAAAATCTTCTTCTCACAAGCCGCATCGGAGTGGGGACAAGCACAAGAGGATGAGGAAGGTGGTCTACTACGAGACCGACACTTCATCGACATCCACCTCCGGCTCCGACGCGGCATCCGTCACTTCTAAACGCCAAGAGCGTAAGAAGTATAGTAAGATTCCCCTACGCTATCCTCGTGTTCCTAAACATACACCTCTACTTTCCGTCCCATTAGGTAAACCACCAACTTTTAATGGTGAAGATTATGCTATGTGGAGTAATTTAATGCGATTTCATCTAACCTCTCTCCACAAGAGTATATGGGATGTTGTTGAGTATGGTGTAC**T**GGTACCATCTATAGGGGATGAGGACTATGACTCAGACGAAGTGGCCCAAATCGAGCACTTCAACTCCCAAGCCGCAACCATCCTCCTTGCCTCCCTAAGCAAGGAGGAATACAACAAAGTACAAGGGTTGAAGAACGCCAAAGAGATTTGGGATCTTCTCAAGACGGCGCACGAAGGTGATGAACTCACCAAGATCACCAAGCGGGAAACGATCGAGGGGGAGCTCGGTCGCTTCCGTCTTCGCCAAGGGGAGGAGCCACAAGACATGTACAACCGGCTCAAGACCTTGGTAAACCAAGTGCGCAACCTCGGGAGTACAAAGTGGGATGACCACGAAGTGGTTAAGGTTATTCTAAGAGCTCTTATTTTCCTTAACCCCACTCAAGTAC**------**AATTAATTCGTGGGAACCCTAGATATCCACTAATGACCCCCGAGGAAGTTATCGGGAATTTTGTGAGTTTTGAATGCATGATTAAGGGCTCCAAGAAGATCAACGAGCTTGACGAGCCTTCCACCTCCGAGGCGCAACCGGTGGCCTTCAAGGCAACGGAGGA**A**AAGAAGGAGGAGTCTACACCAAGTAGACAACCAATTGACGCCTCCAAGCTCGACAACGAGGAGATGGCCCTAATCATCAAAAGCTTTCGGCAAATTCTCAAGCAACGGAAGGGGAAGGACTACAAACCCCGTTCCAAGAAGGTTTGCTACAAGTGTGGTAAGCCCGGTCACTTTATTGCAAAATGTCCTATGTCTAGTGACAGTGACAGGGGCGACGACAAGAAGGGAAGAAGAAAGGAGAAGAAGAAGTATTACAAGAAGAAGGGCGGCGATGCCCATGTTTGTCGGGAGTGGGACTCCGACAAAAGCTCAAGCGACTCCTCCGACGACGAGGACGCCGCCAACATCACCGTCACCAAAGGCCTTCTCTTCCCCAACGTCGGCCACAAGTGTCTCATGGCCAAGGACGGCAAAAAGAAGGTAAAATCAAGGTCCTCCACTAAATATGAAACATCTAGTGATGAGGATGATGATAAAAATGAGGAGGATAACT**G**GCGCATCCTTTTTGCTAACCTTAACATGGAACAAAAGGAAAAATTAAATGAACTAATTAGTGCCATCCATGAAAAGGATGATCTCTTGGACTCCCAAGAGGACTTCCTAATCAAGGAGAATAAGAAACACGTTAAGGTTAAAAATGCTTATGCTCTAGAAGTAGAAAAATGTAACAAATTATCTAGTGAGCTAAGCATGTGCCATGACACTATTGCCAACCTTAGAAGTGAAAATGCTAAATTAATTGCTAAGGTAGATTCTCATGTTTGCATTGATCCTAGAAATGATAATGTTGATTTACTTGCTAGGATTGATGAGTTAAATGTTTCCATTGC**G**AGCCTTAGAAATGAGAATGAGAAACTAATTGCTAAGGCTAAGGATTTTGATGTTTGCAATGCTACTATTTCCGACCTTAGAACTAAAAATGATATGTTGCATGCTAAGGTTGTTGAACTAAAATCTTGCAAACCCTCTACATCTAATGTTGAGCATATTTCCATTTGTACTAGATGTAGAGATATTAATGTTGATGCTATCCATGATCACCTAGCCTTAATTAATAAACAAAATGATCACATAGCTCAACTAAATGCTAA**T**ATTAGAGAGCATGACTTAGAAAATGAAAAATTTAAATTGGCTAGAAGCATGCTCTATAATGGGAGACGTCCTGGCATCAAGGATGGCATTGGCTTCCAAAGGGGAGACAATGTCAAACTTAATGCCCCACCTAAAAATTTGTCTAACTTTGTTAAGGGCAAGGCTCCCATGCCTCAGGATAACGAGGGTTACATTTTGTACCCTGCCGGTTATCCCGAGAGCAAAATTAGGAGAATTCACTCTAGGAAGTCTCACTCTGGCCCTAACCATGCTTTTATGTATAAGGGTGAGACATCTAGCTCTAGGCAACCAACCCGTGCCAAGTTGCCTAGAAAGAAAAC**C**CCTAATGCATCAAATGATCATGCCATTTCATTTAAAACTTTTGATGCATCTTATGTACTTACTAGCAAATCCGGCAAGGTAGTTGCCAAATTTGTTGGGGGCAAGCACAAGGGTTCCAAAACTTGTGTTTGGGTACCCAAAGTTCTTGTATCTAATGTCAAAGGACCCAAAACAGTTTGGGTACCTAAAGT**T**AAGAACTAAATTTGTTTTGTAGGTTTATGCATCCGGGGGCTCAAGTTGGATACTCGACAGCGGGTGCACAAACCACATGACCGGGGAGAAAAGGATGTTCTCCTCATA**A**GAGAAAAACAAAG**T**TCCCCAACGAGCTATCACATTCGGGGATGGAAATCAAGGGTTGGTCAAAGGTTTGGGTAAAATTGCTATTTCACCTGACCATTCCATTTCCAATGTTTTTCTTGTTGATTCATTAGATTACAACTTGCTTTCTGTTTCCCAATTATGTCAAATGGGCTACAACTGTCTTTTTACCGATATAGGTGTCACTGTCTTTAGAAGAAGTGATGATTCAATAGCATTTAAGGGTGTGTTAGAGGGTCAGCTATACTTAGTAGATTTTGATAGAGCTGAGCTCAACACATGTTTAATTGCTAAGACTAACATGGGTTGGCTCTGGCATCGCCGACTAGCCCATGTTGGGATGAAGAATCTTCATAAGCTTCTAAAGGGAGAGCACATTTTAGGACTAACCAATGTTCATTTTGAGAAAGACAGGATTTGTAGCGCATGCCAAGCAGGGAAGCAAGTTGGCACTCATCATCCACACAAGAACATAATGACGACTGAC**C**GGCCACTGGAGCTCCTACACATGGATCTATTCGGCCCGATCGCTTACATAAGCATCGGCGGGAGTAAGTACTGTCTAGTTATTGTGGATGATTAT**G**CTCGCTTCACTTGGGTATTCTTTTTACAGGAAAAATCTCAAACCCAAGAGACCTTAAAGGGATTCTTGAGACGAGCTCAAAATGAGTTCGGCTTAAGGATCAAGAAAATAAGAAGCGACAATGGGACGGAGTTCAAGAACTCTCAAATTGAAAGCTTCCTTGAGGAGGAGGGCATCAAGCATGAGTTCTCTTCTCCCTACACGCCACAACAAAACGGTGTAGTGGAGAGGAAGAATCGAACTCTATTGGACATGGCAAGAACCATGCTTGATGAGTACAAGACACCGGACCGGTTTTGGGCCGAAGCGGTCAATACCGCCTGCTACGCCATCAACCGGTTATATCTTCACCGAATCCTCAAGA**T**GACATCATATGAACTCCTAACCGGTAAAAAGCCCAACATTTCATATTTTAGAGTTTTTGGTAGCAAATGCTTCATTCTTATTAAAAGAGGTAGAAAATCT**T**AATTTGCTCCTAAAACTGTAGAAGGCTTTTTACTTGGTTATGACTCAAACACAAGGGCATATAGGGTCTTTAACAAGTCCACTGGACTAGTTGAAATCTCTTGTGACGTTGTGTTTGATGAAACTAACGGCTCTCAAGTAGAGCAAGTTGATCTTGATGAGATAGGTGAAGAACAGGCTCCATGCATCGCGCTAAGGAACATGTCCATCGGGGATGTGTGTCCTAAGGAATCCGAAGAGCCTCCAAGTACACAAGATCAACCATCCTCCTCCATGCAAGCATCTCCACCAACTCAAAATGAGGATGAGGCTCAAAATGATGAAGAGCAAAATCAAGAAGACGAGCCACCTCAAGATGATAGCAATGATCAAGGGGGAGATACAAATGATCAAGAAAAGGAGGATGAGGAAGAACCAAGACCGCCACACCCAAGAGTCCACCAAGCAATCCAACGAGATCACCCCGTCGACACCATCCTCGGCGACATTCATAAGGGGGTAACTACTCGATCTCGGGTTGCTCATTTTTGTGAACATTACTCTTTTGTTTCCTCCATTGAGCCACACAGGGTAGAGGAAGCTCTCCAAGATTCGGATTGGGTGGTGGCGATGCAAGAGGAGCTCAACAATTTCACGAGGAACGAGGTATGGCATTTAGTTCCACGTCCTAACCAAAATGTTGTAGGAACCAAATGGGTCTTCCGCAACAAGCAAGATGAGCATGGTGTG**C**TGACAAGGAACAAAGCTCGACTCGTGGCCAAAGGGTATTCACAAGTCGAAGGTTTGGATTTTGGTGAAACCTATGCACCCGTAGCTAGGCTTGAGTCAATTCGCATATTATTGGCCTATGCTACTTACCATGGCTTTAAGCTCTATCAAATGGACGTGAAAAGTGCCTTCCTCAATGGACCGATCAAGGAAGAAGTCTATGTTG**G**GCAACCTCCCGGCTTTGAAGACAGTGAGTATCCTAATCATGTCTATAGGCTCTCTAAGGCGCTTTATGGGCTCAAGCAAGCCCCAAGAGCATGGTATGAATGCCTTAGAGATTTCCTTATTGCTAATGGCTTCAAAGTCGGCAAGGCCGATCCTACACTCTTTACTAAAACTCTTGAAAATGACTTGTTTGTATGCCAAATTTATGTTGATGATATTATATTTGGGTCTACTAACGAGTCTACATGTGAAGAGTTTAGTAGGATCATGACACAGAAATTCGAGATGTCGATGATGGGGGAGTTGAAGTATTTTCTAGGATTCCAAGTCAAGCAACTCCAAGAGGGCACCTTCATTAGCCAAACGAAGTACACTCAAGACATTCTTGCTAAGTTTGGGATGAAGGATGCCAAACCCATCAA**CT**CACCCATGGGAACTAATGGGCATCTCGACCTCGACACGGGAGGTAAGTCCGTGGATCAAAAGGTATACCGGTCAATGATTGGTTCATTGCTTTATTTATGTGCATCTCGACCGGACATTATGCTTTCCGTTTGCATGTGTGCAAGATTCCAATCCGACCCTAAGGAATCACACCTTACGGCCGTAAAACGAATCTTGAGATATTTGGCTTATACCCCTAAGTTTGGGCTTTGGTACCCTCGGGGATCCACATTTGATTTACTTGGTTATTCGGATGCCGATTGGGCGGGGTGCAAAATCAATAGGAAGAGCACATCGGGGACTTGCCAGTTCTTGGGAAGATCCTTGGTGTCTTGGGCTTCAAAGAAGCAAAATTCGGTCGCTCTTTCCACCGCCGAAGCCGAGTACATTGCCGCAGGACATTGTTGCGCGCAATTGCTTTGGATGAGGCAAACCCTGCGGGACTACGGTTACAAATTAACCAAAGTCCCTTTGCTATGTGATAATGAGAGTGCAATTAAAATGGCCGACAATCCCGTCGAGCATAGCCGCACTAAGCACATAGCCATTCGGTATCATTTTCTTAGGGATCACCAACAAAAGGGGGATATCGAGATTTCTTACATTAATACTAAAGATCAATTAGCCGATATCTTTACCAAGCCACTTGATGAACAATCTTTTACCAGACTTAGGCATGAGCTCAATATTCTTGATTCTAGAAATTTCTTTT**T**CTAAGCTTGCACACATAGCTCATTTGAATATCTTTGATCATATCTCTTTTATATGCTATGACTAATGTGTTTTCAAGTCTATTTCAAACCAAGTCATAGGTATATTGAAAGGGAATTGGAGTCTTCGGCGAAGAAAAAGGCTTCCACTCCGTAACTCATACTTCGCCATCACTCCGAGCAACTCTCTCTTCCTTGGGGAGAAATGAGCATCAAAGAAAAGGACTTCATCCTTCGAGGAGAGAGCAAAAGCTCAAAAGCAAAAGGACCGGATTTCGTCTTTGGTATAATCTTAACTCATTTACTTATGACCAAAGGGGAAGAACTTACTTCAAGAGCTCTAATGATTCCGTTTTTGGCGATTCATGCCAAAAAGGGGGAGAAATGAGCCCAAAGCAAAGGACCGCA**T**CACCACCACCACCAAATTCAAAAACTTAGTGCTTTCCAAAAGTCTTTATCATTTGGTATCCTATTATGTTCAAAAGGGGGAGAAAGTAGTATTTCAAAAATGGTATATCAAAACCCTCTTGAACACTAAGAGGTGGATCTCTTTTAGGGGGAGTTTTGTTTAGTCAAAGGAAAAGCATTTGAAACAGGGGGAGGAAATTTCAAATCTTGAAAATGCTTTTGCAAACTCTTATTTATTTACCTTTGACTATTTGCAAAAGATCTATGAAAAGGATTTACAAAAGGTTTTGCAAAAACAAAACAAGTGGTGCAAACGTGGTCCAAAATGTTATATAAGAAAGAAACATTCCTNNNNNNNNNNTTTCAAACTTTTTTAAGACTTAAACCAACATCCTGTGTAAGGGGAACCGTAGCCCAACTTTCATGAAGCTTCGAAAAACCATTACCTCATCTTTCTTAGGAAGAGGAACAATATTCTCACCATCGATTCTCACTATAGATACATCATGAAAATATCTACCCTTCATAGCCTCAACATGCCCTTTCTTTACAGTTCATTTCCCGAAGACCACGTGACTCGACCTCCATGGCCGATCTTCGACATCATCATTACCACTGTCAACATAAAAATCCTCGCTGTCTCCAGAATCTTCAAACAGCCTAGCTAAAATTTC**T**TCAGTTATTTTCTCAACATTAGTCCTCTTCATAGCTTTGTAAAACCCAGCCAGTGCGAGATCCTCACTCCTCTTGTCTTCGGCCATCTCAGCTTTGGTTAAAACAAAAAGGCAAAGCTCGAAAACAGTCGCGGTTATAGTAGCAACAAGCTAAAAGCCAACGGAAACTTGATAGCACGAAAAATATTTTATCACAATCCTCATATATAAATGCAAAGCACTACTACAGAGTGGCCCCCACGGTTCAGAAGGTTTCGCTATTCTAGCGAAGGGAAGGTGTTTTTTCGGACCTTCGGCTAAAGGCTTTCGTTCGTTTCACAGTCTGAGTTTGTTACA**G**AGAAACAAACTAACACTGCGAGGGGCTA
